# Supplementary material for: Exciton-vibrational dynamics induces efficient self-trapping in a substituted nanoring
Source: Royal Society of Chemistry journal article supplement (doi:10.1039/d2cp03162k), 2022-01-01
Supplement: d2cp03162k1.pdf [file d2cp03162k1.pdf]

## Supplementary information

### Exciton-vibrational dynamics induces efficient self-trapping in a substituted nanoring

Laura Alfonso Hernandez<sup>1</sup>, Victor M. Freixas<sup>1</sup>, Beatriz Rodriguez-Hernandez<sup>1</sup>, Sergei Tretiak<sup>2</sup>, Sebastian Fernandez-Alberti<sup>1\*</sup> and Nicolas Oldani<sup>1</sup>

<sup>1</sup>Departamento de Ciencia y Tecnología, Universidad Nacional de Quilmes/CONICET, B1876BXD Bernal, Argentina

<sup>2</sup>Theoretical Division and Center for Integrated Nanotechnologies, Los Alamos National Laboratory, Los Alamos, New Mexico 87545, USA

\*corresponding author: [sfalberti@gmail.com](mailto:sfalberti@gmail.com)

T-[12]CPP

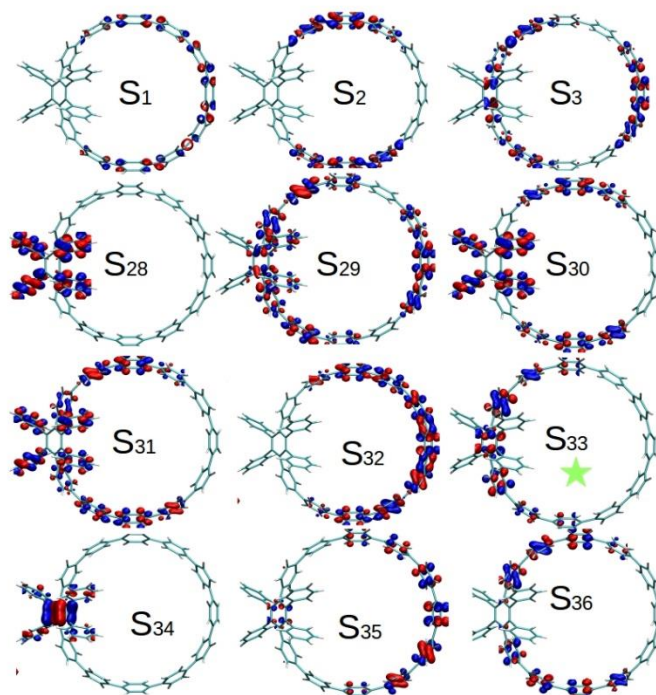

[12]CPP

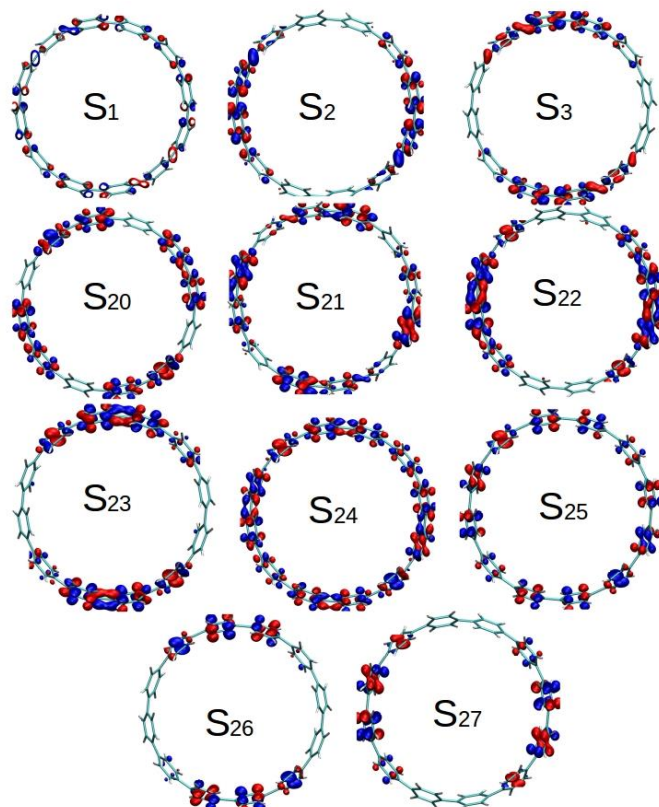

**Figure S1.** Spatial localization of the electronic transition densities for selected excited states of [12]CPP and T-[12]CPP-

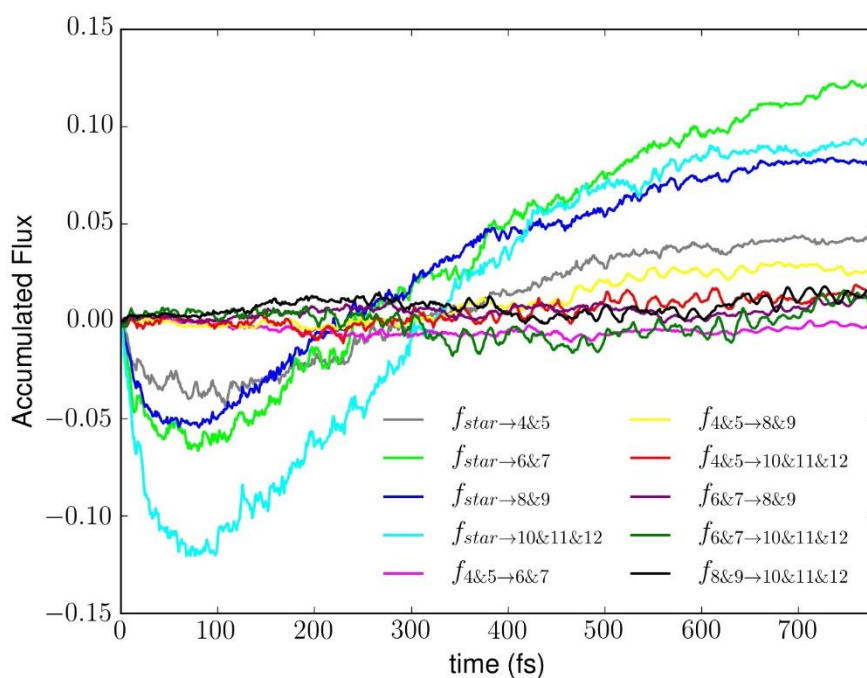

**Figure S2.** Accumulated fluxes among different ensembles of phenylene units during NEXMD simulations of T-[12]CPP. Units are numbered according to the pattern shown in Fig. 1(a)
